# Supplementary material
Source: publisher site journal article supplement (https://www.dovepress.com/article/317627)
Supplement: Supplementary file 1 [file get_supplementary_file.php]

**Supplementary Table 1**. Questionnaire measuring the study validity by using the grading system suggested by Chiou et al20

| Questionsa | Lang et al21 | Venkatesh et al22 | Oda et al23 | White et al24 | Lin et al26 |
| --- | --- | --- | --- | --- | --- |
| Was the study objective presented in a clear, specific, and measurable manner? | 1b | 1 | 1 | 1 | 1 |
| Were the perspective of the analysis (societal, third-party payer, etc.) and reasons for its selection stated? | 1 | 1 | 0 | 0 | 0 |
| Were variable estimates used in the analysis from the best available source (i.e. Randomized Control Trial-Best, Expert Opinion-Worst)? | 1 | 1 | 1 | 1 | 1 |
| Was uncertainty handled by: 1) statistical analysis to address random events; 2) sensitivity analysis to cover a range of assumptions? | 1 | 1 | 0 | 1 | 0 |
| Was incremental analysis performed between alternatives for resources and costs? | 1 | 1 | 0 | 1 | 0 |
| Was the methodology for data abstraction (including value health states and other benefits) stated? | 1 | 1 | 0 | 1 | 0 |
| Did the analytic horizon allow time for all relevant and important outcomes? Were benefits and costs that went beyond 1 year discounted (3-5%) and justification given for the discount rate? | 0 | 1 | 0 | 0 | 0 |
| Was the measurement of costs appropriate and the methodology for the estimation of quantities and unit costs clearly described? | 1 | 1 | 1 | 1 | 1 |
| Were the primary outcome measures for the economic evaluation clearly stated and were the major short term, long term, and negative outcomes included? | 1 | 1 | 1 | 1 | 1 |
| Were the health outcomes measures/scales valid and reliable? If previously tested valid and reliable measures were not available, was justification given for the measures/scales used? | 0 | 1 | 0 | 1 | 0 |
| Were the economic model (including structure), study methods and analysis, and the components of the numerator and denominator displayed in a clear transparent manner? | 1 | 1 | 0 | 1 | 0 |
| Were the choice of economic model, main assumptions and limitations of the study stated and justified? | 1 | 1 | 0 | 1 | 0 |
| Did the authors explicitly discuss direction and magnitude of potential biases? | 1 | 1 | 0 | 0 | 0 |
| Were the conclusions/recommendations of the study justified and based on the study results? | 1 | 1 | 1 | 1 | 1 |
| Was there a statement disclosing the source of funding for the study? | 1 | 0 | 1 | 1 | 0 |
|  |  |  |  |  |  |
| Validation levelc | 13 | 14 | 6 | 12 | 5 |

**Notes**: aThese questions were adopted from the questionnaire suggested by Chiou et al20; b1 for yes and 0 for no; cthe sum of yes responses.
